# Supplementary material for: Validation of a Harmonized Enzyme-Linked-Lectin-Assay (ELLA-NI) Based Neuraminidase Inhibition Assay Standard Operating Procedure (SOP) for Quantification of N1 Influenza Antibodies and the Use of a Calibrator to Improve the Reproducibility of the ELLA-NI With Reverse Genetics Viral and Recombinant Neuraminidase Antigens: A FLUCOP Collaborative Study
Source: PubMed Central journal article supplement (PMC9248865; doi:10.3389/fimmu.2022.909297), 2022-06-17
Supplement: Table_1.pdf [file Table_1.pdf]

|     |        |                         | ANOVA estimate Series 1 |         |              | ANOVA estimate Series 2 |         |              |
|-----|--------|-------------------------|-------------------------|---------|--------------|-------------------------|---------|--------------|
| Lab | Sample | Number of valid results | GMT                     | Rep (%) | CV IP CV (%) | GMT                     | Rep (%) | CV IP CV (%) |
| 1   | 1      | 16                      | 295,0                   | 10,4    | 33,7         | 291,9                   | 17,3    | 39,0         |
| 1   | 2      | 16                      | 159,3                   | 7,8     | 28,9         | 169,8                   | 14,2    | 29,3         |
| 1   | 3      | 16                      | 253,3                   | 5,4     | 22,3         | 269,2                   | 13,4    | 35,1         |
| 1   | 4      | 16                      | 30,3                    | 17,0    | 34,4         | 27,1                    | 6,5     | 26,3         |
| 1   | 5      | 16                      | 231,1                   | 8,0     | 32,4         | 222,5                   | 12,1    | 31,9         |
| 1   | 6      | 16                      | 424,4                   | 8,6     | 35,3         | 381,8                   | 7,8     | 29,3         |
| 1   | 7      | 16                      | 80,8                    | 9,2     | 25,0         | 76,5                    | 9,2     | 20,7         |
| 1   | 8      | 16                      | 2563,3                  | 13,6    | 35,6         | 2671,7                  | 20,9    | 36,2         |
| 1   | 9      | 16                      | 4855,5                  | 8,8     | 34,2         | 5061,7                  | 28,7    | 54,2         |
| 2   | 1      | 16                      | 172,3                   | 9,6     | 13,5         | 134,6                   | 26,1    | 30,6         |
| 2   | 2      | 16                      | 74,9                    | 12,2    | 34,0         | 60,4                    | 15,4    | 31,0         |
| 2   | 3      | 16                      | 132,8                   | 19,1    | 32,1         | 104,7                   | 11,9    | 19,7         |
| 2   | 5      | 16                      | 101,1                   | 19,8    | 30,2         | 75,6                    | 18,8    | 38,4         |
| 2   | 6      | 16                      | 183,1                   | 9,3     | 23,7         | 151,1                   | 17,3    | 31,9         |
| 2   | 7      | 16                      | 32,0                    | 14,3    | 14,8         | 30,4                    | 7,7     | 29,4         |
| 2   | 8      | 16                      | 981,8                   | 17,9    | 24,2         | 887,5                   | 3,3     | 13,3         |
| 2   | 9      | 16                      | 2010,9                  | 13,3    | 17,1         | 1657,7                  | 11,2    | 20,6         |
| 3   | 1      | 16                      | 429,7                   | 7,4     | 18,0         | 479,0                   | 6,7     | 17,9         |
| 3   | 2      | 16                      | 202,4                   | 7,9     | 22,9         | 234,5                   | 5,8     | 15,2         |
| 3   | 3      | 16                      | 934,6                   | 10,8    | 23,4         | 1032,4                  | 13,7    | 21,8         |
| 3   | 4      | 16                      | 63,8                    | 11,9    | 22,1         | 64,8                    | 16,6    | 18,7         |
| 3   | 5      | 16                      | 361,8                   | 7,3     | 17,8         | 342,8                   | 7,0     | 8,7          |
| 3   | 6      | 16                      | 655,8                   | 8,6     | 17,1         | 575,8                   | 12,2    | 17,0         |
| 3   | 7      | 16                      | 134,6                   | 15,7    | 20,6         | 129,1                   | 11,5    | 13,3         |
| 3   | 8      | 16                      | 3630,6                  | 15,1    | 18,2         | 3794,3                  | 6,6     | 10,5         |
| 3   | 9      | 16                      | 6804,6                  | 7,1     | 21,8         | 7555,7                  | 10,0    | 12,3         |
| 4   | 1      | 16                      | 577,2                   | 19,0    | 60,2         | 616,6                   | 42,7    | 56,6         |
| 4   | 2      | 16                      | 260,7                   | 14,6    | 41,2         | 278,9                   | 10,9    | 25,7         |
| 4   | 3      | 16                      | 439,0                   | 11,3    | 32,5         | 440,8                   | 6,9     | 35,9         |
| 4   | 4      | 16                      | 32,8                    | 28,2    | 28,2         | 40,7                    | 18,4    | 19,1         |
| 4   | 5      | 16                      | 380,4                   | 9,7     | 26,7         | 400,9                   | 7,4     | 28,6         |
| 4   | 6      | 16                      | 619,2                   | 18,7    | 28,1         | 634,6                   | 13,3    | 30,3         |
| 4   | 7      | 16                      | 140,5                   | 18,4    | 18,4         | 110,1                   | 21,9    | 33,8         |
| 4   | 8      | 16                      | 4232,7                  | 19,5    | 26,7         | 4023,0                  | 15,8    | 37,8         |
| 4   | 9      | 16                      | 6473,9                  | 26,5    | 35,5         | 7023,5                  | 20,6    | 34,0         |
| 5   | 1      | 8                       | 566,2                   | 10,4    | 20,2         | 540,6                   | 3,1     | 14,7         |
| 5   | 2      | 8                       | 215,1                   | 9,7     | 15,7         | 222,3                   | 8,5     | 15,1         |
| 5   | 3      | 8                       | 341,5                   | 13,9    | 19,0         | 346,5                   | 2,3     | 13,3         |
| 5   | 4      | 8                       | 52,3                    | 9,4     | 13,1         | 54,9                    | 5,2     | 10,0         |
| 5   | 5      | 8                       | 339,8                   | 7,0     | 22,2         | 359,9                   | 12,5    | 19,3         |
| 5   | 6      | 8                       | 563,7                   | 8,0     | 14,2         | 586,3                   | 5,3     | 13,8         |
| 5   | 7      | 8                       | 103,8                   | 7,2     | 8,1          | 99,8                    | 13,1    | 21,0         |
| 5   | 8      | 8                       | 3214,7                  | 11,3    | 27,0         | 3559,7                  | 5,4     | 13,8         |
| 5   | 9      | 8                       | 6720,0                  | 8,5     | 28,1         | 6901,9                  | 15,0    | 20,2         |
| 6   | 1      | 16                      | 209,4                   | 5,2     | 5,2          | 209,4                   | 4,1     | 4,5          |
| 6   | 2      | 16                      | 107,2                   | 5,6     | 7,4          | 103,3                   | 4,6     | 5,5          |
| 6   | 3      | 16                      | 190,3                   | 3,1     | 6,3          | 188,4                   | 4,4     | 5,1          |
| 6   | 4      | 16                      | 11,4                    | 11,1    | 11,1         | 11,5                    | 8,0     | 13,5         |
| 6   | 5      | 16                      | 136,7                   | 4,5     | 4,5          | 140,4                   | 3,9     | 5,5          |
| 6   | 6      | 16                      | 276,6                   | 1,5     | 5,7          | 267,3                   | 1,3     | 3,1          |
| 6   | 7      | 16                      | 36,5                    | 5,1     | 12,4         | 35,4                    | 6,4     | 12,5         |
| 6   | 8      | 16                      | 2054,8                  | 2,1     | 5,0          | 1996,8                  | 3,4     | 4,0          |
| 6   | 9      | 16                      | 3697,5                  | 3,6     | 7,6          | 3733,9                  | 2,4     | 6,8          |

**Table S1.** Repeatability and intermediate precision by sample for each lab. A model one-way-ANOVA with run as a random factor was used to calculate the repeatability %CV (within-assay variability) and Intermediate Precision %CV (between-assay variability) by laboratory.
