# Supplementary material for: Validation of a Harmonized Enzyme-Linked-Lectin-Assay (ELLA-NI) Based Neuraminidase Inhibition Assay Standard Operating Procedure (SOP) for Quantification of N1 Influenza Antibodies and the Use of a Calibrator to Improve the Reproducibility of the ELLA-NI With Reverse Genetics Viral and Recombinant Neuraminidase Antigens: A FLUCOP Collaborative Study
Source: PubMed Central journal article supplement (PMC9248865; doi:10.3389/fimmu.2022.909297), 2022-06-17
Supplement: Table_2.pdf [file Table_2.pdf]

| Lab | N samples | N results used | IP CV (%)           | IP CV (%)           | IP CV (%)            | IP CV (%)            |
|-----|-----------|----------------|---------------------|---------------------|----------------------|----------------------|
|     |           |                | Singlicate Series 1 | Singlicate Series 2 | Intraplate duplicate | Interplate duplicate |
| 1   | 9         | 144            | 31,6                | 34,4                | 31,5                 | 30,9                 |
| 2   | 8         | 128            | 24,7                | 27,8                | 25,6                 | 16,8                 |
| 3   | 9         | 144            | 20,3                | 15,5                | 16,7                 | 14,5                 |
| 4   | 9         | 144            | 34,4                | 34,6                | 31,4                 | 30,7                 |
| 5   | 9         | 72             | 19,6                | 16,1                | 16,5                 | 16,2                 |
| 6   | 9         | 144            | 7,7                 | 7,6                 | 6,7                  | 6,6                  |

**Table S2.** Overall Intermediate Precision (IP) %CV for singleton and duplicate testing of samples. A mixed procedure of SAS and two-way-ANOVA, with the sample and the run as random factors, was performed on  $\log_{10}$ -transformed titres in order to calculate the overall precision for singleton and duplicate testing of sera samples. IP was calculated for each lab with results calculated from a single measurement (Singlicate series 1 or Singlicate series 2), results calculated with the two measurements on the same plate (Intraplate duplicate) or results calculated with the two measurements of the two series of plates (Interplate duplicate).
