# Supplementary material for: Validation of a Harmonized Enzyme-Linked-Lectin-Assay (ELLA-NI) Based Neuraminidase Inhibition Assay Standard Operating Procedure (SOP) for Quantification of N1 Influenza Antibodies and the Use of a Calibrator to Improve the Reproducibility of the ELLA-NI With Reverse Genetics Viral and Recombinant Neuraminidase Antigens: A FLUCOP Collaborative Study
Source: PubMed Central journal article supplement (PMC9248865; doi:10.3389/fimmu.2022.909297), 2022-06-17
Supplement: Table_3.pdf [file Table_3.pdf]

| Lab | Operator | N samples | N results used | Series 1   |           | Series 2   |           |
|-----|----------|-----------|----------------|------------|-----------|------------|-----------|
|     |          |           |                | Rep CV (%) | IP CV (%) | Rep CV (%) | IP CV (%) |
| 1   | 1        | 9         | 72             | 26,5       | 26,5      | 31,4       | 32,4      |
| 1   | 2        | 9         | 72             | 29,9       | 30,0      | 20,6       | 21,0      |
| 2   | 1        | 8         | 64             | 14,8       | 18,1      | 19,7       | 19,9      |
| 2   | 2        | 8         | 64             | 24,2       | 24,2      | 26,3       | 31,9      |
| 3   | 1        | 9         | 72             | 17,4       | 18,1      | 13,2       | 13,5      |
| 3   | 2        | 9         | 72             | 14,7       | 16,1      | 11,9       | 13,6      |
| 4   | 1        | 9         | 72             | 34,7       | 36,8      | 33,8       | 35,4      |
| 4   | 2        | 9         | 72             | 28,8       | 28,8      | 29,7       | 31,1      |
| 5   | 1        | 9         | 72             | 17,6       | 18,2      | 15,2       | 15,2      |
| 6   | 1        | 9         | 72             | 7,8        | 8,0       | 7,3        | 7,9       |
| 6   | 2        | 9         | 72             | 5,9        | 6,6       | 6,7        | 6,7       |

**Table S3.** Repeatability and Intermediate precision (IP) OCV by operator. A model 2-way-ANOVA with run and sample and their interaction as random qualitative factors was used to calculate precision by operator. Repeatability %CV (within-assay variability) and Intermediate Precision (IP) %CV (between-assay variability) are shown per lab, per operator.
